# Supplementary material
Source: Springer Nature journal article supplement (https://www.springermedizin.de/resource/supplementary/12957_2010_791_MOESM7_ESM.pdf/9565880)

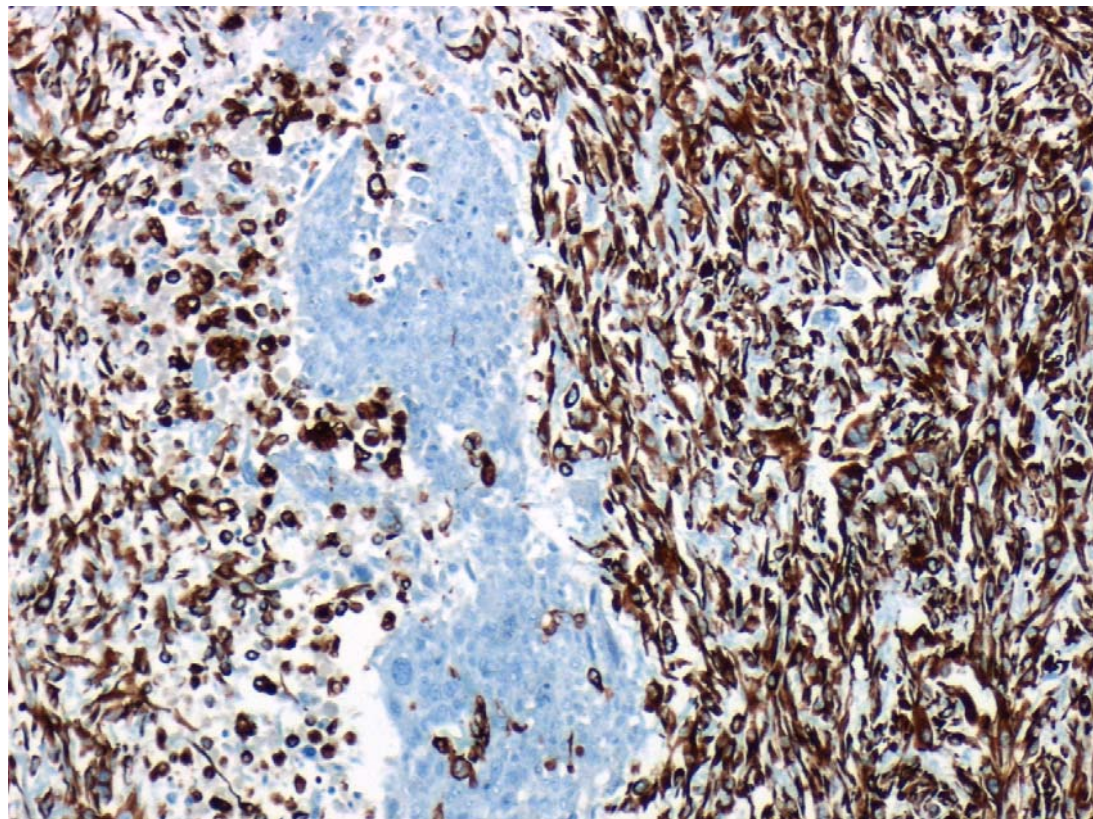

Supplement: MOESM7 [file 9565880]
